# Supplementary material for: A Multi-Species Investigation of Sponges’ Filtering Activity towards Marine Microalgae
Source: MDPI journal article supplement (doi:10.3390/md20010024), 2021-12-24
Supplement: s1 [file s1]

## **Supplementary Materials**

### **A Multi-Species Investigation of Sponges' Filtering Activity Towards**

### **Marine Microalgae**

Despoina Varamogianni-Mamatsi <sup>1,2</sup>, Thekla I. Anastasiou <sup>1</sup>, Emmanouela Vernadou <sup>1</sup>, Nikos Papandroulakis <sup>1</sup>, Nicolas Kalogerakis <sup>2</sup>, Thanos Dailianis <sup>1,\*</sup> and Manolis Mandalakis <sup>1,\*</sup>

<sup>1</sup> Institute of Marine Biology, Biotechnology & Aquaculture, Hellenic Centre for Marine Research, 715 00 Heraklion Crete, Greece

<sup>2</sup> School of Chemical and Environmental Engineering, Technical University of Crete, 731 00 Chania, Greece

\* Correspondence: M.M. mandalakis@hcmr.gr; Tel.: +30-2810-337855; Fax: +30-2810-337822; T.D. thanosd@hcmr.gr; Tel.: +30-2810-337741; Fax: +30-2810-337822

## CONTENTS

**Table S1.** Mean wet weight of the used sponge fragments, derived from the measurements prior and after the clean-up experiments. These are presented along with standard deviation and relative standard deviation (%RSD).

**Figure S1.** Photos of representative individuals of (a) *Agelas oroides*, (b) *Axinella cannabina*, (c) *Chondrosia reniformis* and (d) *Sarcotragus foetidus* taken from their collection sites.

**Figure S2.** Photos of the regenerated fragments of (a) *Agelas oroides*, (b) *Axinella cannabina*, (c) *Chondrosia reniformis* and (d) *Sarcotragus foetidus* in the land-based tanks.

**Table S1.** Mean wet weight of the used sponge fragments, derived from the measurements prior and after the clean-up experiments. These are presented along with standard deviation and relative standard deviation (%RSD).

|                        | <i>A. oroides</i> |      |      |      |      | <i>A. cannabina</i> |      |      |      |      |
|------------------------|-------------------|------|------|------|------|---------------------|------|------|------|------|
| Fragment No            | #1                | #2   | #3   | #4   | #5   | #1                  | #2   | #3   | #4   | #5   |
| Average wet weight (g) | 75.2              | 70.6 | 74.7 | 67.7 | 60.9 | 43.7                | 57.8 | 50.2 | 54.7 | 60.3 |
| Standard deviation (g) | 3.5               | 1.3  | 3.1  | 4.2  | 1.1  | 6.8                 | 3.4  | 4.5  | 2.5  | 3.3  |
| %RSD                   | 5%                | 2%   | 4%   | 6%   | 2%   | 16%                 | 6%   | 9%   | 5%   | 6%   |

  

|                        | <i>C. reniformis</i> |      |      |       |      | <i>S. foetidus</i> |       |      |      |       |
|------------------------|----------------------|------|------|-------|------|--------------------|-------|------|------|-------|
| Fragment No            | #1                   | #2   | #3   | #4    | #5   | #1                 | #2    | #3   | #4   | #5    |
| Average wet weight (g) | 82.8                 | 90.5 | 74.0 | 103.2 | 79.9 | 134.8              | 100.5 | 77.2 | 94.4 | 139.5 |
| Standard deviation (g) | 4.7                  | 1.9  | 5.0  | 0.4   | 1.7  | 0.7                | 8.1   | 3.6  | 0.3  | 6.6   |
| %RSD                   | 6%                   | 2%   | 7%   | 0%    | 2%   | 1%                 | 8%    | 5%   | 0%   | 5%    |

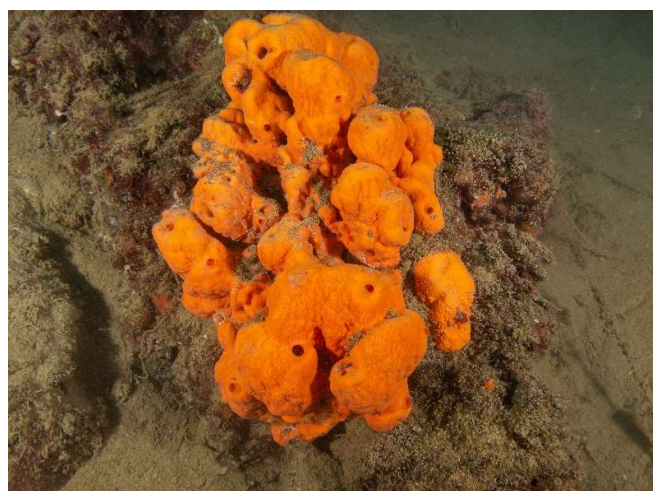

(a)

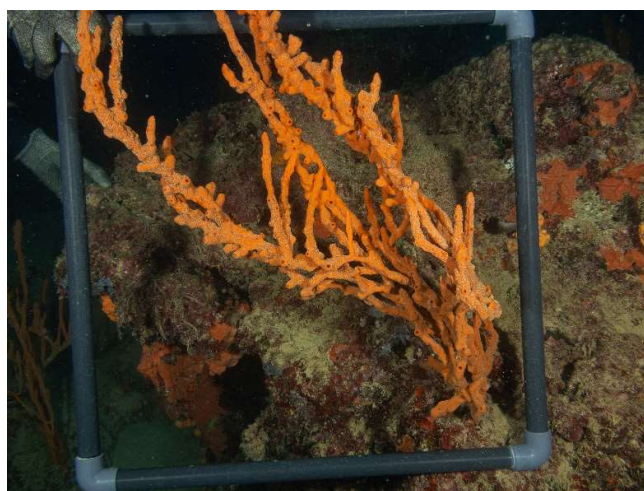

(b)

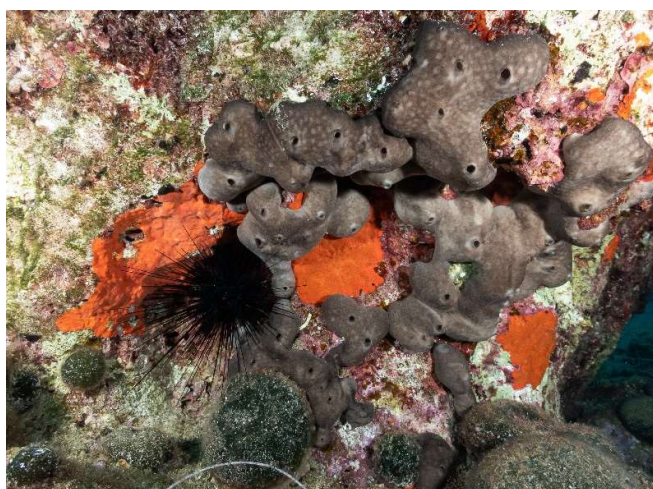

(c)

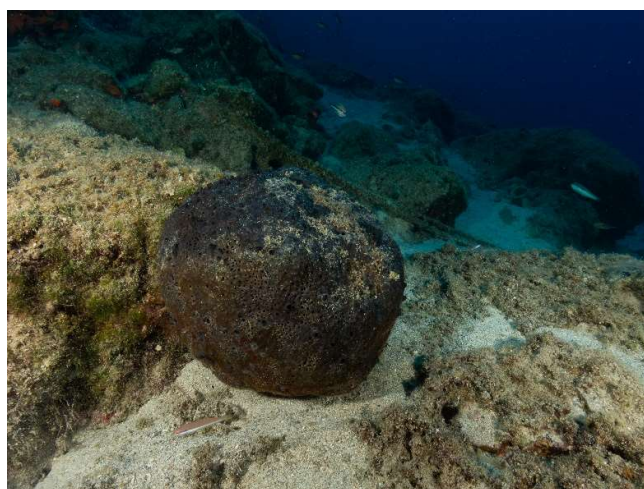

(d)

**Figure S1.** Photos of representative individuals of (a) *Agelas oroides*, (b) *Axinella cannabina*, (c) *Chondrosia reniformis* and (d) *Sarcotragus foetidus* taken from their collection sites.



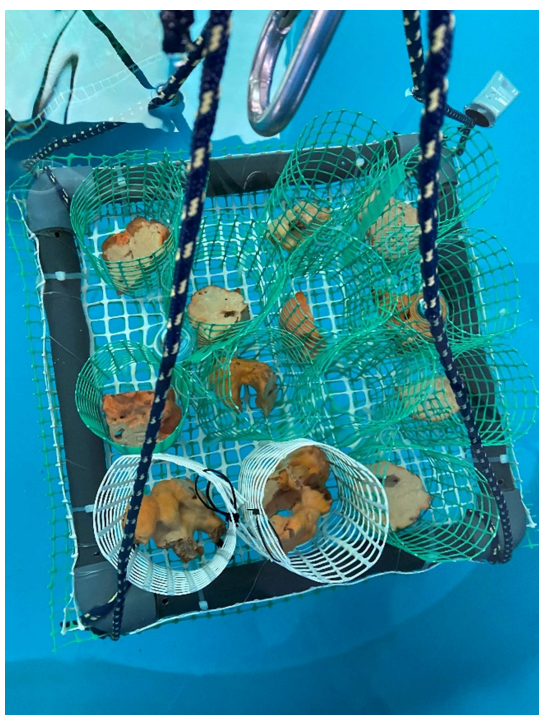

(a)

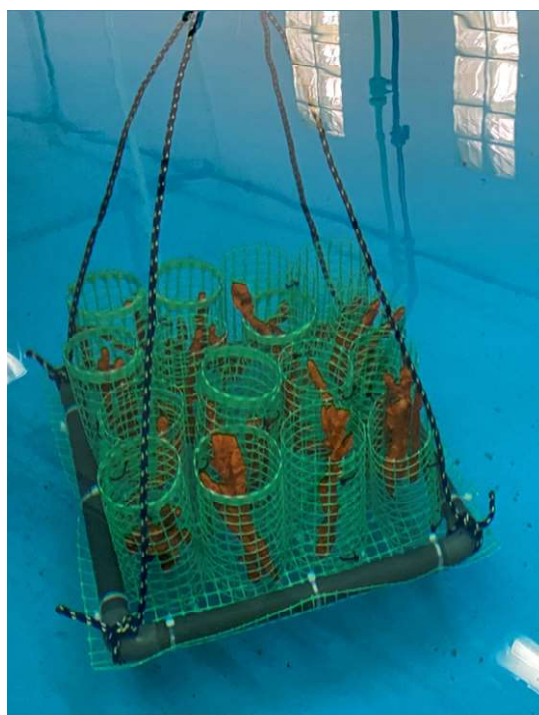

(b)

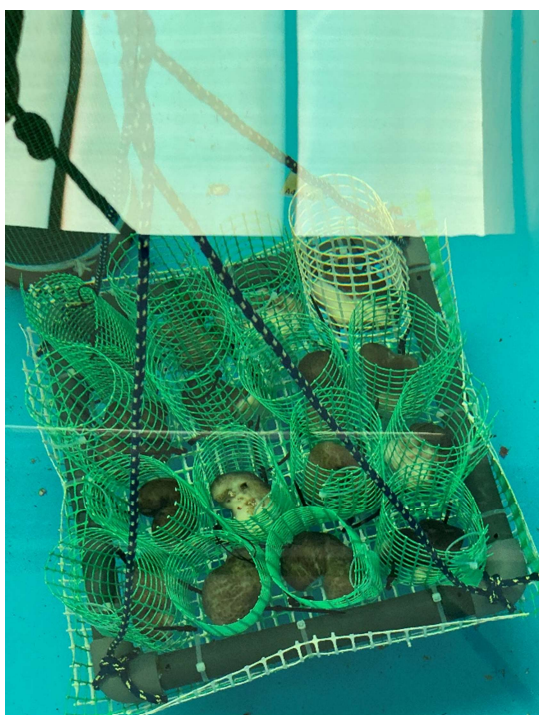

(c)

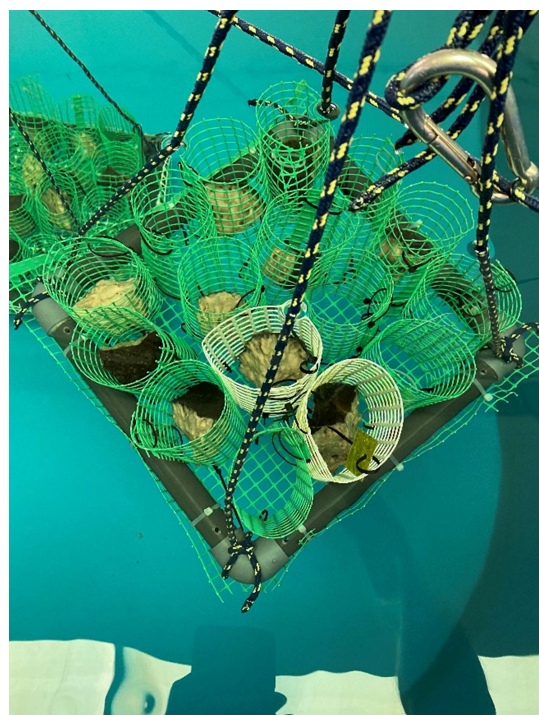

(d)

**Figure S2.** Photos of the regenerated fragments of (a) *Agelas oroides*, (b) *Axinella cannabina*, (c) *Chondrosia reniformis* and (d) *Sarcotragus foetidus* in the land-based tanks.
